# Supplementary material for: Pharmacogenomic analysis of retinoic-acid induced dyslipidemia in congenic rat model
Source: PubMed Central journal article supplement (PMC4247747; doi:10.1186/1476-511x-13-172), 2014-11-17
Supplement: 12944_2014_1160_MOESM2_ESM.pdf [file 12944_2014_1160_MOESM2_ESM.pdf]

## **SUPPLEMENTARY INFORMATION**

**for manuscript**

**Pharmacogenomic analysis of retinoic-acid induced dyslipidemia in congenic rat model**

**Michaela Krupková<sup>1</sup>, František Liška<sup>1</sup>, Lucie Šedová<sup>1</sup>, Drahomíra Křenová<sup>1</sup>, Vladimír Křen<sup>1</sup>, Ondřej Šeda<sup>1,2</sup>**

<sup>1</sup>Institute of Biology and Medical Genetics, the First Faculty of Medicine, Charles University and the General Teaching Hospital, Prague, Czech Republic

<sup>2</sup>Institute of Molecular Genetics of the Academy of Sciences of the Czech Republic, Vídeňská 1083, 142 20 Prague 4, Czech Republic

**Address for correspondence:**

Ondřej Šeda, MD, PhD

Institute of Biology and Medical Genetics, First Faculty of Medicine,

Charles University in Prague,

Albertov 4, 12800 Prague 2, Czech Republic

Phone: (4202) 2496 8147; Fax: (4202) 2491 8666; email: [osed@lf1.cuni.cz](mailto:osed@lf1.cuni.cz)

**Supplementary Table.** Two-way ANOVA for triacylglycerol, cholesterol concentrations in 20 lipid subfractions (F1-F20) and lipoprotein particle size.

| <b>Phenotype</b>            | <b>STRAIN</b>     | <b>ATRA</b>       | <b>S*ATRA</b>     |
|-----------------------------|-------------------|-------------------|-------------------|
| <b>Triacylglycerol (TG)</b> |                   |                   |                   |
| F1 (CM)                     | <i>0.52</i>       | <b>&lt;0.0001</b> | <b>&lt;0.0001</b> |
| F2 (CM)                     | <i>0.80</i>       | <b>&lt;0.0001</b> | <b>0.0002</b>     |
| F3 (large VLDL)             | <i>0.88</i>       | <b>0.0002</b>     | <b>0.0012</b>     |
| F4 (large VLDL)             | <i>0.55</i>       | <b>0.020</b>      | <b>0.033</b>      |
| F5 (large VLDL)             | <i>0.28</i>       | <i>0.07</i>       | <i>0.35</i>       |
| F6 (medium VLDL)            | <i>0.18</i>       | <b>0.008</b>      | <i>0.95</i>       |
| F7 (small VLDL)             | <i>0.41</i>       | <b>0.0001</b>     | <i>0.24</i>       |
| F8 (large LDL)              | <i>0.91</i>       | <b>&lt;0.0001</b> | <b>0.0044</b>     |
| F9 (medium LDL)             | <i>0.27</i>       | <b>0.0031</b>     | <i>0.19</i>       |
| F10 (small LDL)             | <i>0.71</i>       | <i>0.91</i>       | <i>0.13</i>       |
| F11 (very small LDL)        | <i>0.83</i>       | <i>0.39</i>       | <i>0.13</i>       |
| F12 (very small LDL)        | <b>&lt;0.0001</b> | <b>0.016</b>      | <b>0.003</b>      |
| F13 (very small LDL)        | <i>0.98</i>       | <i>0.22</i>       | <i>0.44</i>       |
| F14 (very large HDL)        | <i>0.06</i>       | <b>&lt;0.0001</b> | <b>&lt;0.0001</b> |
| F15 (very large HDL)        | <b>0.0015</b>     | <b>0.0015</b>     | <b>0.038</b>      |
| F16 (large HDL)             | <b>0.019</b>      | <b>0.0003</b>     | <b>0.004</b>      |
| F17 (medium HDL)            | <i>0.13</i>       | <b>0.0016</b>     | <b>0.003</b>      |
| F18 (small HDL)             | <i>0.39</i>       | <b>0.027</b>      | <i>0.06</i>       |
| F19 (very small HDL)        | <i>0.19</i>       | <b>0.023</b>      | <b>0.047</b>      |
| F20 (very small HDL)        | <i>0.93</i>       | <b>0.008</b>      | <b>0.041</b>      |

| <b>Phenotype</b>       | <b>STRAIN</b>     | <b>ATRA</b>       | <b>S*ATRA</b> |
|------------------------|-------------------|-------------------|---------------|
| <b>Cholesterol (C)</b> |                   |                   |               |
| F1 (CM)                | <i>0.59</i>       | <b>0.0004</b>     | <b>0.0013</b> |
| F2 (CM)                | <i>0.28</i>       | <b>0.0001</b>     | <b>0.0004</b> |
| F3 (large VLDL)        | <i>0.28</i>       | <b>&lt;0.0001</b> | <b>0.0002</b> |
| F4 (large VLDL)        | <i>0.52</i>       | <b>0.0002</b>     | <b>0.0005</b> |
| F5 (large VLDL)        | <i>0.79</i>       | <b>0.0002</b>     | <b>0.0031</b> |
| F6 (medium VLDL)       | <i>0.97</i>       | <b>&lt;0.0001</b> | <b>0.019</b>  |
| F7 (small VLDL)        | <i>0.07</i>       | <b>0.0012</b>     | <b>0.0056</b> |
| F8 (large LDL)         | <i>0.15</i>       | <b>0.0078</b>     | <b>0.0034</b> |
| F9 (medium LDL)        | <i>0.56</i>       | <i>0.09</i>       | <i>0.06</i>   |
| F10 (small LDL)        | <b>0.016</b>      | <i>0.06</i>       | <i>0.55</i>   |
| F11 (very small LDL)   | <b>0.040</b>      | <i>0.17</i>       | <i>0.67</i>   |
| F12 (very small LDL)   | <b>0.006</b>      | <b>0.014</b>      | <i>0.06</i>   |
| F13 (very small LDL)   | <b>0.0031</b>     | <b>0.0035</b>     | <i>0.18</i>   |
| F14 (very large HDL)   | <i>0.18</i>       | <b>0.0031</b>     | <i>0.94</i>   |
| F15 (very large HDL)   | <b>&lt;0.0001</b> | <i>0.07</i>       | <i>0.72</i>   |
| F16 (large HDL)        | <b>0.0027</b>     | <i>0.15</i>       | <i>0.57</i>   |
| F17 (medium HDL)       | <i>0.84</i>       | <i>0.18</i>       | <i>0.70</i>   |
| F18 (small HDL)        | <i>0.13</i>       | <i>0.13</i>       | <b>0.031</b>  |
| F19 (very small HDL)   | <i>0.57</i>       | <i>0.66</i>       | <i>0.23</i>   |
| F20 (very small HDL)   | <i>0.47</i>       | <i>0.27</i>       | <i>0.13</i>   |

The significance levels of two-way ANOVA's STRAIN, ATRA and STRAIN\*ATRA (S\*ATRA) factor interactions are shown (significant p values in bold, non-significant in italics).
